# Supplementary material for: An in-depth simulation analysis of the reaction mechanism of ethanol dehydration to ethylene and carbon deposition on the γ-Al2O3(100) surface
Source: Royal Society of Chemistry journal article supplement (doi:10.1039/d4nj05114a), 2025-01-01
Supplement: d4nj05114a1.pdf [file d4nj05114a1.pdf]

## SUPPORTING INFORMATION

An in-depth simulation analysis of the reaction mechanism of ethanol  
dehydration to ethylene and carbon deposition on the  $\gamma$ -Al<sub>2</sub>O<sub>3</sub>(100) surface

*Tongyan Liang*<sup>1,2,3+</sup>, *Liangfeng An*<sup>1,2,3+</sup>, *Junxiu Lu*<sup>1,2,3</sup>, *Yingzhe Yu*<sup>1,2,3\*</sup>, *Minhua Zhang*<sup>1,2,3</sup>

<sup>1</sup> Key Laboratory for Green Chemical Technology of Ministry of Education, R&D Center for Petrochemical Technology, Tianjin University, Tianjin 300072, P.R. China

<sup>2</sup> Zhejiang Institute of Tianjin University, Ningbo, Zhejiang, 315201, China.

<sup>3</sup> State Key Laboratory of Engines, Tianjin University, Tianjin 300072, China.

\* Corresponding author.

+These authors contributed equally to this work and should be considered co-first authors.

E-mail address: yzhyu@tju.edu.cn

**Table S1.** Changes in structural parameters of ethanol on the  $\gamma$ -Al<sub>2</sub>O<sub>3</sub>(100) surface

| Structural parameters            | Ethanol           |                  |
|----------------------------------|-------------------|------------------|
|                                  | Before adsorption | After adsorption |
| $d(\text{C1-C2})/\text{\AA}$     | 1.51              | 1.50             |
| $d(\text{C1-H2})/\text{\AA}$     | 1.08              | 1.07             |
| $d(\text{C1-H3})/\text{\AA}$     | 1.08              | 1.07             |
| $d(\text{C2-H4})/\text{\AA}$     | 1.10              | 1.08             |
| $d(\text{C2-H5})/\text{\AA}$     | 1.08              | 1.08             |
| $d(\text{C2-H6})/\text{\AA}$     | 1.08              | 1.07             |
| $d(\text{C1-O})/\text{\AA}$      | 1.45              | 1.48             |
| $d(\text{O-H1})/\text{\AA}$      | 0.97              | 0.98             |
| $\angle(\text{H1-O-C1})/^\circ$  | 109.26            | 110.57           |
| $\angle(\text{H2-C1-C2})/^\circ$ | 109.85            | 111.07           |
| $\angle(\text{C2-C1-O})/^\circ$  | 109.10            | 111.05           |
| $\angle(\text{H4-C2-C1})/^\circ$ | 111.04            | 111.68           |
| $\angle(\text{H5-C2-C1})/^\circ$ | 110.64            | 111.13           |
| $\angle(\text{H6-C2-C1})/^\circ$ | 110.45            | 109.43           |
| $\angle(\text{O-C1-C2})/^\circ$  | 112.66            | 111.05           |
| $\angle(\text{H2-C2-H3})/^\circ$ | 107.28            | 108.99           |
| $\angle(\text{H3-C1-C2})/^\circ$ | 109.77            | 110.94           |
| $\angle(\text{H4-C2-H5})/^\circ$ | 108.24            | 108.24           |
| $\angle(\text{H4-C2-H6})/^\circ$ | 108.22            | 108.24           |
| $\angle(\text{H5-C2-H6})/^\circ$ | 108.16            | 108.01           |

**Table S2.** Changes in structural parameters of water on the  $\gamma$ -Al<sub>2</sub>O<sub>3</sub>(100) surface

| Structural parameters           | Water             |                  |
|---------------------------------|-------------------|------------------|
|                                 | Before adsorption | After adsorption |
| $d(\text{H1-O})/\text{\AA}$     | 0.97              | 0.98             |
| $d(\text{H2-O})/\text{\AA}$     | 0.97              | 0.97             |
| $\angle(\text{H1-O-H2})/^\circ$ | 106.03            | 106.36           |

**Table S3.** Changes in structural parameters of ether on the  $\gamma$ -Al<sub>2</sub>O<sub>3</sub>(100) surface

| Structural parameters             | Ether             |                  |
|-----------------------------------|-------------------|------------------|
|                                   | Before adsorption | After adsorption |
| $d(\text{C1-C2})/\text{\AA}$      | 1.51              | 1.50             |
| $d(\text{C3-C4})/\text{\AA}$      | 1.51              | 1.51             |
| $d(\text{C2-O})/\text{\AA}$       | 1.44              | 1.47             |
| $d(\text{C3-O})/\text{\AA}$       | 1.44              | 1.47             |
| $d(\text{C1-H1})/\text{\AA}$      | 1.08              | 1.07             |
| $d(\text{C1-H2})/\text{\AA}$      | 1.08              | 1.07             |
| $d(\text{C1-H3})/\text{\AA}$      | 1.10              | 1.08             |
| $d(\text{C2-H4})/\text{\AA}$      | 1.08              | 1.07             |
| $d(\text{C3-H6})/\text{\AA}$      | 1.08              | 1.07             |
| $\angle(\text{H1-C1-H2})/^\circ$  | 108.13            | 108.56           |
| $\angle(\text{H1-C1-H3})/^\circ$  | 108.30            | 108.50           |
| $\angle(\text{H2-C1-H3})/^\circ$  | 108.16            | 107.51           |
| $\angle(\text{H1-C1-C2})/^\circ$  | 110.94            | 111.24           |
| $\angle(\text{H2-C1-C2})/^\circ$  | 110.52            | 109.54           |
| $\angle(\text{H3-C1-C2})/^\circ$  | 110.70            | 111.38           |
| $\angle(\text{H4-C2-C1})/^\circ$  | 110.12            | 111.68           |
| $\angle(\text{H5-C2-C1})/^\circ$  | 110.21            | 111.13           |
| $\angle(\text{O-C2-C1})/^\circ$   | 109.42            | 112.90           |
| $\angle(\text{C2-O-C3})/^\circ$   | 112.34            | 114.65           |
| $\angle(\text{O-C3-C4})/^\circ$   | 109.39            | 112.01           |
| $\angle(\text{H4-C2-O})/^\circ$   | 110.04            | 107.95           |
| $\angle(\text{H5-C2-O})/^\circ$   | 110.06            | 107.41           |
| $\angle(\text{H4-C2-H5})/^\circ$  | 106.97            | 107.77           |
| $\angle(\text{H8-C4-H9})/^\circ$  | 108.06            | 108.25           |
| $\angle(\text{H8-C4-H10})/^\circ$ | 108.19            | 107.82           |

**Table S4.** Changes in structural parameters of ethane on the  $\gamma$ -Al<sub>2</sub>O<sub>3</sub>(100) surface

| Structural parameters           | Ethane            |                  |
|---------------------------------|-------------------|------------------|
|                                 | Before adsorption | After adsorption |
| $d(\text{C1-C2})/\text{\AA}$    | 1.52              | 1.52             |
| $d(\text{C1-H1})/\text{\AA}$    | 1.08              | 1.08             |
| $d(\text{C1-H2})/\text{\AA}$    | 1.08              | 1.08             |
| $d(\text{C1-H3})/\text{\AA}$    | 1.08              | 1.08             |
| $d(\text{C2-H3})/\text{\AA}$    | 1.08              | 1.08             |
| $d(\text{C2-H4})/\text{\AA}$    | 1.08              | 1.08             |
| $d(\text{C2-H5})/\text{\AA}$    | 1.08              | 1.08             |
| $d(\text{C2-H6})/\text{\AA}$    | 1.08              | 1.08             |
| $\angle(\text{H1-C1-C2})^\circ$ | 111.50            | 111.29           |
| $\angle(\text{H2-C1-C2})^\circ$ | 111.52            | 111.67           |
| $\angle(\text{H3-C1-C2})^\circ$ | 111.51            | 111.24           |
| $\angle(\text{H1-C1-H2})^\circ$ | 107.32            | 107.60           |
| $\angle(\text{H1-C1-H3})^\circ$ | 107.44            | 107.42           |
| $\angle(\text{H1-C1-H3})^\circ$ | 107.32            | 107.40           |

**Table S5.** Changes in structural parameters of ethylene on the  $\gamma$ -Al<sub>2</sub>O<sub>3</sub>(100) surface

| Structural parameters           | Ethylene          |                  |
|---------------------------------|-------------------|------------------|
|                                 | Before adsorption | After adsorption |
| $d(\text{C1-C2})/\text{\AA}$    | 1.32              | 1.32             |
| $d(\text{C1-H1})/\text{\AA}$    | 1.07              | 1.07             |
| $d(\text{C1-H2})/\text{\AA}$    | 1.07              | 1.07             |
| $d(\text{C2-H3})/\text{\AA}$    | 1.07              | 1.07             |
| $d(\text{C2-H4})/\text{\AA}$    | 1.07              | 1.07             |
| $\angle(\text{H1-C1-C2})^\circ$ | 121.25            | 120.79           |
| $\angle(\text{H2-C1-C2})^\circ$ | 121.25            | 121.08           |
| $\angle(\text{H3-C2-C1})^\circ$ | 121.25            | 121.23           |
| $\angle(\text{H4-C2-C1})^\circ$ | 121.25            | 120.81           |
| $\angle(\text{H1-C1-H2})^\circ$ | 117.50            | 118.09           |
| $\angle(\text{H3-C2-H4})^\circ$ | 117.50            | 117.96           |

**Table S6.** Changes in structural parameters of butene on the  $\gamma$ -Al<sub>2</sub>O<sub>3</sub>(100) surface

| Structural parameters            | Butene            |                  |
|----------------------------------|-------------------|------------------|
|                                  | Before adsorption | After adsorption |
| $d(\text{C1-C2})/\text{\AA}$     | 1.32              | 1.32             |
| $d(\text{C1-H1})/\text{\AA}$     | 1.07              | 1.07             |
| $d(\text{C1-H2})/\text{\AA}$     | 1.07              | 1.07             |
| $d(\text{C2-H3})/\text{\AA}$     | 1.07              | 1.07             |
| $d(\text{C2-C3})/\text{\AA}$     | 1.49              | 1.07             |
| $d(\text{C3-H4})/\text{\AA}$     | 1.08              | 1.08             |
| $d(\text{C3-H5})/\text{\AA}$     | 1.08              | 1.08             |
| $d(\text{C4-H6})/\text{\AA}$     | 1.08              | 1.08             |
| $d(\text{C4-H7})/\text{\AA}$     | 1.08              | 1.08             |
| $d(\text{C4-H8})/\text{\AA}$     | 1.08              | 1.08             |
| $d(\text{C3-C4})/\text{\AA}$     | 1.53              | 1.52             |
| $\angle(\text{H1-C1-H2})/^\circ$ | 118.17            | 118.82           |
| $\angle(\text{H1-C1-C2})/^\circ$ | 121.14            | 121.55           |
| $\angle(\text{H2-C1-C2})/^\circ$ | 120.69            | 119.31           |
| $\angle(\text{H3-C2-C1})/^\circ$ | 118.14            | 117.57           |
| $\angle(\text{C1-C2-C3})/^\circ$ | 125.34            | 125.34           |
| $\angle(\text{C2-C3-H4})/^\circ$ | 109.39            | 108.27           |
| $\angle(\text{H4-C3-H5})/^\circ$ | 106.41            | 105.30           |
| $\angle(\text{C3-C4-H6})/^\circ$ | 111.10            | 111.21           |
| $\angle(\text{C3-C4-H7})/^\circ$ | 111.25            | 111.21           |
| $\angle(\text{C3-C4-H8})/^\circ$ | 110.92            | 112.62           |
| $\angle(\text{H6-C4-H7})/^\circ$ | 107.66            | 106.42           |
| $\angle(\text{H6-C4-H8})/^\circ$ | 108.07            | 107.55           |
| $\angle(\text{H7-C4-H8})/^\circ$ | 107.67            | 107.56           |
